# Supplementary material for: Novel orthohepeviruses in wild rodents from São Paulo State, Brazil
Source: PubMed Central journal article supplement (PMC5998382; doi:10.1016/j.virol.2018.03.025), 2018-06

Orthohepevirus

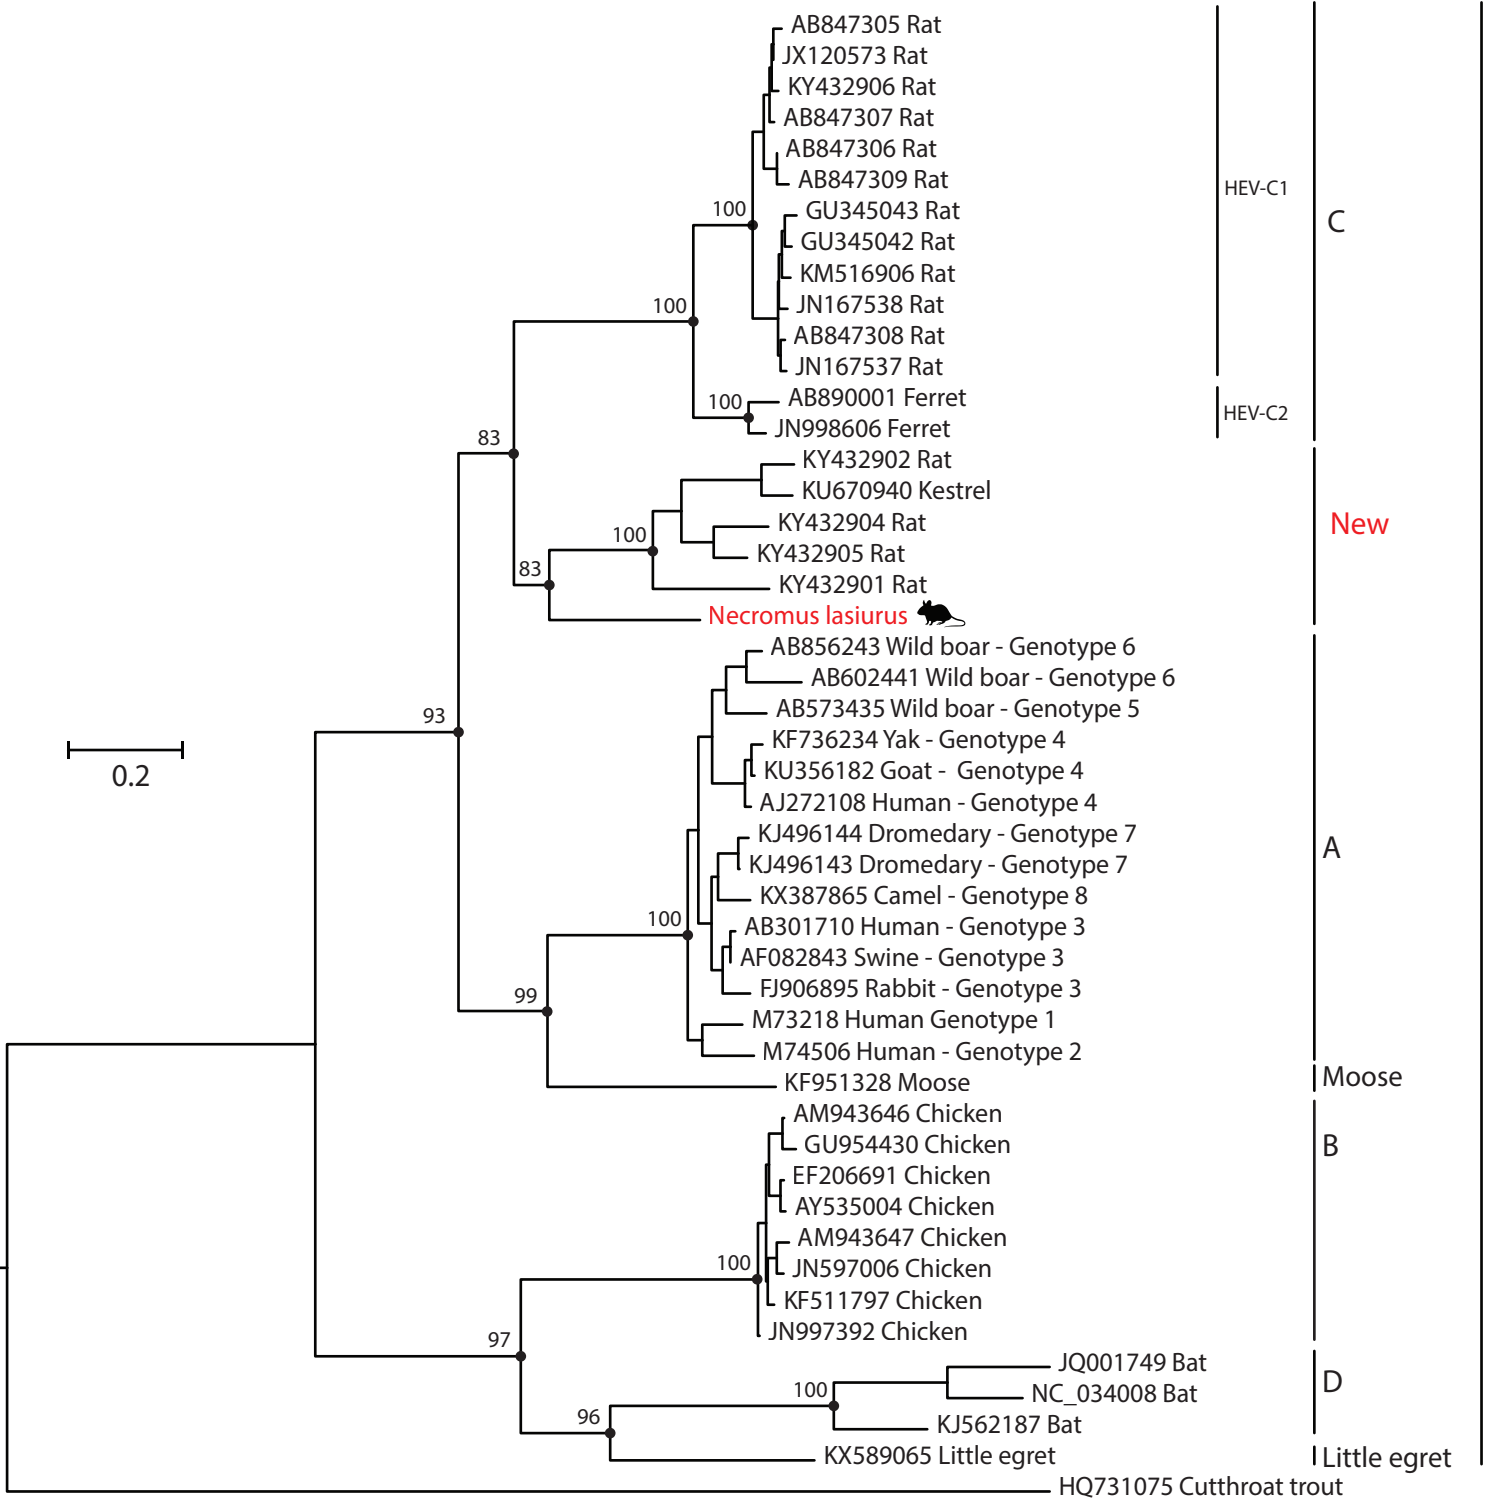

Supplement: mmc1.pdf [file mmc1.pdf]
